# Supplementary material for: Error Characteristic Analysis of Satellite-Based Precipitation Products over Mainland China
Source: MDPI journal article supplement (doi:10.3390/atmos13081211), 2022-08-01
Supplement: s1 [file s1]

Archive with 1 entries (1 files):
- atmosphere-1784331-supplementary.pdf
