# Supplementary material for: Error Characteristic Analysis of Satellite-Based Precipitation Products over Mainland China
Source: MDPI journal article supplement (doi:10.3390/atmos13081211), 2022-08-01
Supplement: s1 [file s1 › atmosphere-1784331-supplementary.pdf]

# Error Characteristic Analysis of Satellite-Based Precipitation Products over Mainland China

Hanjia Fu <sup>1</sup>, Li Zhu <sup>1</sup>, Vincent Nzabarinda <sup>2</sup>, Xiaoyu Lv <sup>1</sup> and Hao Guo <sup>1,\*</sup>

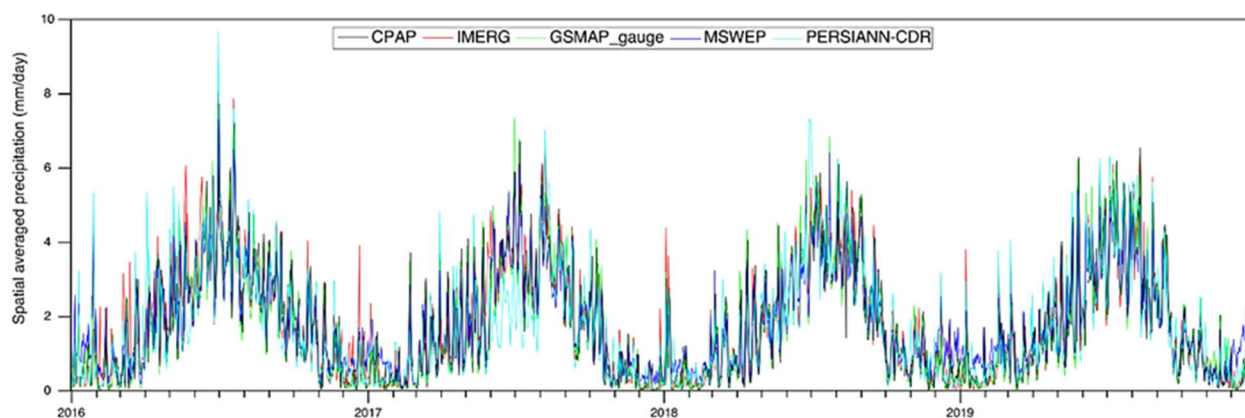

**Figure S1.** The temporal variation of the domain-averaged daily precipitation from 2016 to 2019.
